# Supplementary material
Source: publisher site journal article supplement (http://kjim.org/upload/media/kjim-2019-039-suppl1.pdf)
Supplement: Supplementary file 1 [file kjim-2019-039-suppl1.pdf]

**Supplementary Table 1. Estimated clinical primary patency and target lesion revascularization rate with 95% CI**

| Variable                                                       | Non-CTO-POBA     | Non-CTO-Stenting | CTO-POBA         | CTO-Stenting     |
|----------------------------------------------------------------|------------------|------------------|------------------|------------------|
| Estimated clinical primary patency rate with 95% CI (%)        |                  |                  |                  |                  |
| 1 yr                                                           | 84.2 (80.1–88.5) | 89.6 (86.6–92.8) | 83.7 (79.2–88.5) | 83.9 (80.5–87.5) |
| 2 yr                                                           | 79.5 (74.7–84.6) | 84.5 (80.7–88.6) | 76.1 (70.5–82.1) | 77.1 (72.9–81.5) |
| 3 yr                                                           | 74.7 (68.4–81.5) | 80.4 (75.6–85.5) | 66.8 (58.7–76.1) | 67.4 (61.6–73.7) |
| 4 yr                                                           | 69.3 (61.4–78.3) | 77.7 (72.2–83.6) | 64.2 (55.2–74.7) | 62.7 (55.9–70.4) |
| 5 yr                                                           | 65.0 (55.8–75.6) | 71.2 (64.1–79.2) | 64.2 (55.2–74.7) | 61.3 (54.2–69.3) |
| Estimated target lesion revascularization rate with 95% CI (%) |                  |                  |                  |                  |
| 1 yr                                                           | 88.5 (84.8–92.3) | 93.0 (90.4–95.7) | 89.9 (86.2–93.9) | 89.0 (86.0–92.0) |
| 2 yr                                                           | 82.8 (78.2–87.7) | 89.7 (86.4–93.1) | 85.8 (81.2–90.7) | 82.5 (78.7–86.5) |
| 3 yr                                                           | 80.4 (74.9–86.3) | 86.1 (81.7–90.7) | 76.9 (69.2–85.3) | 73.6 (68.0–79.6) |
| 4 yr                                                           | 78.7 (72.5–85.4) | 82.4 (77.0–88.1) | 74.8 (66.6–84.1) | 68.1 (61.4–75.6) |
| 5 yr                                                           | 74.4 (66.5–83.3) | 74.9 (67.6–82.9) | 74.8 (66.6–84.1) | 65.4 (58.1–73.6) |

CI, confidence interval; CTO, chronic total occlusion; POBA, plain old balloon angioplasty.
